# Supplementary material for: Comparative Analysis of Three Machine-Learning Techniques and Conventional Techniques for Predicting Sepsis-Induced Coagulopathy Progression
Source: MDPI journal article supplement (doi:10.3390/jcm9072113), 2020-07-04
Supplement: s1 [file s1]

**Table S2.** Variables included in the analysis, their estimated values, and *p*-value in multiple linear regression analysis with complete data

|                                                                               | <b>Estimated<br/>values</b> | <b>SE</b> | <b><i>p</i>-value</b> |
|-------------------------------------------------------------------------------|-----------------------------|-----------|-----------------------|
| Pre-existing coagulopathy-related history: Cirrhosis                          | 0.69                        | 0.29      | 0.019                 |
| Bleeding event: Transfusion for bleeding                                      | −0.30                       | 0.18      | 0.102                 |
| Bleeding event: Intracranial hemorrhage                                       | 1.52                        | 0.88      | 0.084                 |
| Anticoagulant therapy, unrelated to sepsis-induced coagulopathy: Antithrombin | −0.28                       | 0.12      | 0.023                 |
| Anticoagulant therapy, unrelated to sepsis-induced coagulopathy: Nafamostat   | 0.61                        | 0.14      | < 0.001               |
| Anticoagulant therapy, unrelated to sepsis-induced coagulopathy: Others       | −1.57                       | 0.76      | 0.039                 |
| PMX                                                                           | 0.49                        | 0.15      | 0.001                 |
| SOFA score, coagulopathy                                                      | −0.31                       | 0.05      | < 0.001               |
| SOFA score, central nervous system                                            | 0.13                        | 0.04      | 0.003                 |
| White blood cell count                                                        | −0.02                       | 0.01      | 0.002                 |
| PT ratio                                                                      | −0.24                       | 0.09      | 0.006                 |
| Lactate                                                                       | 0.05                        | 0.02      | 0.006                 |
| Infection site: Bone/soft tissue                                              | 0.39                        | 0.18      | 0.025                 |
| Infection site: Urinary tract                                                 | −0.44                       | 0.18      | 0.016                 |
| Infection site: Lung                                                          | 0.32                        | 0.15      | 0.037                 |
| Infection site: Others                                                        | −0.96                       | 0.38      | 0.011                 |
| Causal pathogen: Gram-positive coccus                                         | −0.30                       | 0.14      | 0.030                 |

|                               |       |      |       |
|-------------------------------|-------|------|-------|
| Causal pathogen: Fungus       | −0.68 | 0.36 | 0.060 |
| Admission route: Medical ward | −0.22 | 0.13 | 0.077 |

SE, standard error; PMX, polymyxin B hemoperfusion; SOFA, Sequential Organ Failure Assessment; PT ratio, prothrombin:time ratio.
