# Supplementary material for: Comparative Analysis of Three Machine-Learning Techniques and Conventional Techniques for Predicting Sepsis-Induced Coagulopathy Progression
Source: MDPI journal article supplement (doi:10.3390/jcm9072113), 2020-07-04
Supplement: s1 [file s1]

**Table S3.** Variables and their odds ratios in multiple logistic regression analysis with complete data.

|                                                                             | OR   | Lower CL | Upper CL | <i>p</i> -value |
|-----------------------------------------------------------------------------|------|----------|----------|-----------------|
| Age                                                                         | 0.99 | 0.98     | 1        | 0.06            |
| Anticoagulant therapy for sepsis-induced coagulopathy: Antithrombin         | 0.7  | 0.47     | 1.03     | 0.073           |
| Anticoagulant therapy, unrelated to sepsis-induced coagulopathy: Nafamostat | 1.87 | 1.11     | 3.15     | 0.018           |
| Other therapies: Renal replacement therapy for renal indication             | 1.58 | 0.96     | 2.6      | 0.071           |
| PMX                                                                         | 2.59 | 1.64     | 4.07     | < 0.001         |
| SOFA score, coagulopathy                                                    | 0.57 | 0.46     | 0.71     | < 0.001         |
| SOFA score, central nervous system                                          | 1.28 | 1.12     | 1.46     | < 0.001         |
| White blood cell count                                                      | 0.98 | 0.96     | 1        | 0.013           |
| Platelet count                                                              | 1    | 0.99     | 1        | 0.031           |
| PT ratio                                                                    | 0.61 | 0.43     | 0.86     | 0.005           |
| FDP                                                                         | 1    | 1        | 1        | 0.082           |
| Lactate                                                                     | 1.05 | 1        | 1.1      | 0.076           |
| Infection site: Bone/soft tissue                                            | 1.99 | 1.18     | 3.36     | 0.01            |
| Infection site: Lung                                                        | 1.49 | 0.95     | 2.34     | 0.08            |
| Infection site: Others                                                      | 0.13 | 0.02     | 1.06     | 0.057           |
| Blood culture: Negative                                                     | 1.34 | 0.93     | 1.94     | 0.12            |

|                                          |      |      |      |       |
|------------------------------------------|------|------|------|-------|
| Causal pathogen: Gram-positive<br>coccus | 0.64 | 0.41 | 1    | 0.051 |
| Admission route: Medical ward            | 0.62 | 0.41 | 0.92 | 0.017 |

OR, odds ratio; CL, confidence level; PMX, polymyxin B hemoperfusion; SOFA, Sequential Organ Failure Assessment; PT ratio, prothrombin:time ratio; FDP, fibrin/fibrinogen-degradation product
