# Supplementary material for: Comparative Analysis of Three Machine-Learning Techniques and Conventional Techniques for Predicting Sepsis-Induced Coagulopathy Progression
Source: MDPI journal article supplement (doi:10.3390/jcm9072113), 2020-07-04
Supplement: s1 [file s1]

**Table S5.** Variables and their odds ratios included in multiple logistic regression analysis of imputation.

|                                                                              | OR   | Lower CL | Upper CL | <i>p</i> -value |
|------------------------------------------------------------------------------|------|----------|----------|-----------------|
| Pre-existing coagulopathy-related history:<br>Cirrhosis                      | 2.42 | 1.15     | 5.13     | 0.021           |
| Pre-existing coagulopathy-related history:<br>Leukemia                       | 3.53 | 1.63     | 7.63     | 0.001           |
| Anticoagulant therapy, unrelated to sepsis-<br>induced coagulopathy: Heparin | 0.64 | 0.41     | 1        | 0.051           |
| Other therapy: Renal replacement therapy<br>for renal indications            | 2.24 | 1.64     | 3.06     | < 0.001         |
| PMX                                                                          | 1.81 | 1.3      | 2.51     | < 0.001         |
| SOFA score, coagulopathy                                                     | 0.63 | 0.55     | 0.71     | < 0.001         |
| SOFA score, central nervous system                                           | 1.19 | 1.08     | 1.32     | 0.001           |
| White blood cell count                                                       | 0.97 | 0.96     | 0.99     | < 0.001         |
| PT ratio                                                                     | 0.59 | 0.44     | 0.8      | < 0.001         |
| Lactate                                                                      | 1.05 | 1.01     | 1.09     | 0.021           |
| Causal pathogen: Virus                                                       | 0.25 | 0.05     | 1.32     | 0.103           |
| Causal pathogen: Gram-positive coccus                                        | 0.69 | 0.5      | 0.95     | 0.024           |
| Admission route: Transfer from other<br>hospital                             | 0.73 | 0.53     | 1.02     | 0.063           |
| Admission route: Medical ward                                                | 0.59 | 0.41     | 0.83     | 0.003           |

OR, odds ratio; CL, confidence level; PMX, polymyxin B hemoperfusion; SOFA, Sequential Organ Failure Assessment; PT ratio, prothrombin: time ratio.
