# Supplementary material for: Comparative Analysis of Three Machine-Learning Techniques and Conventional Techniques for Predicting Sepsis-Induced Coagulopathy Progression
Source: MDPI journal article supplement (doi:10.3390/jcm9072113), 2020-07-04
Supplement: s1 [file s1]

**Table S4.** Included variables, their estimated value, and *p*-value in multiple linear regression analysis with imputation.

|                                                                               | <b>Estimated<br/>value</b> | <b>SE</b> | <b><i>p</i>-value</b> |
|-------------------------------------------------------------------------------|----------------------------|-----------|-----------------------|
| Pre-existing comorbidities: Liver insufficiency                               | −0.64                      | 0.44      | 0.143                 |
| Pre-existing coagulopathy-related history: Cirrhosis                          | 1.13                       | 0.43      | 0.009                 |
| Pre-existing coagulopathy-related history: Leukemia                           | 0.71                       | 0.29      | 0.013                 |
| Pre-existing coagulopathy-related history: Anti-cancer medication             | 0.42                       | 0.25      | 0.091                 |
| Pre-existing coagulopathy-related history: Warfarin use                       | 0.55                       | 0.28      | 0.047                 |
| <i>Other therapies:</i> Procedure for infection                               | −0.15                      | 0.10      | 0.161                 |
| Bleeding event: Intracranial hemorrhage                                       | 1.49                       | 0.93      | 0.108                 |
| Other therapies: Operation for hemorrhage                                     | −0.86                      | 0.44      | 0.048                 |
| Anticoagulant therapy for sepsis-induced coagulopathy: Antithrombin           | −0.19                      | 0.11      | 0.077                 |
| Anticoagulant therapy for sepsis-induced coagulopathy: Protease inhibitor     | 0.27                       | 0.14      | 0.058                 |
| Anticoagulant therapy, unrelated to sepsis-induced coagulopathy: Nafamostat   | 0.30                       | 0.15      | 0.040                 |
| Anticoagulant therapy, unrelated to sepsis-induced coagulopathy: Warfarin     | −0.91                      | 0.54      | 0.094                 |
| Anticoagulant therapy, unrelated to sepsis-induced coagulopathy: Antiplatelet | −0.55                      | 0.39      | 0.161                 |

|                                                                         |       |      |       |
|-------------------------------------------------------------------------|-------|------|-------|
| Anticoagulant therapy, unrelated to sepsis-induced coagulopathy: Others | −1.03 | 0.53 | 0.054 |
| Renal replacement therapy for renal indications                         | 0.42  | 0.14 | 0.003 |
| PMX                                                                     | 0.45  | 0.13 | 0.001 |
| VA-ECMO                                                                 | 1.06  | 0.72 | 0.144 |
| VV-ECMO                                                                 | 0.67  | 0.43 | 0.121 |
| SOFA score, coagulopathy                                                | −0.41 | 0.04 | 0.000 |
| SOFA score, central nervous system                                      | 0.11  | 0.04 | 0.003 |
| White blood cell count                                                  | −0.01 | 0.00 | 0.005 |
| PT ratio                                                                | −0.26 | 0.09 | 0.002 |
| D-dimer                                                                 | 0.00  | 0.00 | 0.121 |
| Lactate                                                                 | 0.04  | 0.01 | 0.002 |
| Causal pathogen: Gram-positive coccus                                   | −0.19 | 0.11 | 0.092 |
| Admission route: Transfer from other hospital                           | −0.19 | 0.12 | 0.117 |
| Admission route: Medical ward                                           | −0.43 | 0.13 | 0.001 |

SE, standard error; PMX, polymyxin B hemoperfusion; VA-ECMO, veno-arterial extracorporeal membranous oxygenation; VV-ECMO, veno-venous extracorporeal membranous oxygenation; SOFA, Sequential Organ Failure Assessment; PT ratio, prothrombin:time ratio
