# Supplementary material for: Comparative Analysis of Three Machine-Learning Techniques and Conventional Techniques for Predicting Sepsis-Induced Coagulopathy Progression
Source: MDPI journal article supplement (doi:10.3390/jcm9072113), 2020-07-04
Supplement: s1 [file s1]

**Table S1.** Covariates included in the three machine-learning techniques PMX, polymyxin B hemoperfusion; VA-ECMO, veno-arterial extracorporeal membranous oxygenation; VV-ECMO, veno-venous extracorporeal membranous oxygenation; IABP, intra-aortic balloon pumping, APACHE, Acute Physiology and Chronic Health Evaluation; SIRS, Systemic Inflammatory Response Syndrome; SOFA, Sequential Organ Failure Assessment; PT ratio, prothrombin:time ratio; FDP, fibrin/fibrinogen-degradation product

|                                                  |                                                                                                                           |
|--------------------------------------------------|---------------------------------------------------------------------------------------------------------------------------|
| <i>Patient characteristics</i>                   | Age, Sex, Weight                                                                                                          |
| <i>Pre-existing comorbidities</i>                | Liver insufficiency, Chronic respiratory disorder, Chronic heart failure, Chronic kidney disease, Immunocompromised       |
| <i>Pre-existing coagulopathy-related history</i> | Cirrhosis, Leukemia, Anticancer medication, Warfarin use, Other                                                           |
| <i>Infection site</i>                            | Catheter related, Bone/soft tissue, Infectious endocarditis, Central nervous system, Urinary tract, Lung, Abdomen, Others |
| <i>Blood culture</i>                             | Positive, Negative, No attempt                                                                                            |
| <i>Causal pathogen</i>                           | Gram-negative rod, Gram-positive coccus, Fungus, Virus, Mixed, Other, Unknown                                             |
| <i>Admission route</i>                           | Medical ward, Emergency department, Transfer from other hospital                                                          |
| <i>Bleeding event</i>                            | Transfusion for bleeding, Death from exsanguination, Intracranial hemorrhage                                              |
| <i>Anticoagulant therapy for</i>                 | Antithrombin, Thrombomodulin, Protease inhibitor, heparin                                                                 |

|                                                                                   |                                                                                                                                                                                                                                     |
|-----------------------------------------------------------------------------------|-------------------------------------------------------------------------------------------------------------------------------------------------------------------------------------------------------------------------------------|
| <i>sepsis-induced<br/>coagulopathy</i>                                            |                                                                                                                                                                                                                                     |
| <i>Anticoagulant<br/>therapy not<br/>for sepsis-<br/>induced<br/>coagulopathy</i> | Nafamostat, Heparin, Warfarin, Antiplatelet, Others                                                                                                                                                                                 |
| <i>Other<br/>therapies</i>                                                        | Immunoglobulin, Low-dose steroid, Renal replacement therapy for renal indication, Renal replacement therapy for cytokine modulation, PMX, Plasmapheresis, VA-ECMO, VV-ECMO, IABP, Procedure for infection, Operation for hemorrhage |
| <i>Illness<br/>severity score<br/>on Day 1</i>                                    | APACHE II score, SIRS score, SOFA score lung, SOFA score kidney, SOFA score liver, SOFA score cardiovascular, SOFA score coagulopathy, SOFA score central nervous system                                                            |
| <i>Laboratory<br/>data on Day 1</i>                                               | White blood cell count, Platelet count, Hemoglobin, PT ratio, FDP, D-dimer, Lactate                                                                                                                                                 |
